# Machine learning for optimization of multiscale biological circuits

Charlotte Merzbacher,<sup>1</sup> Oisín Mac Aodha,<sup>1,2</sup> and Diego A. Oyarzún<sup>1,2,3,4</sup>

<sup>1</sup>*School of Informatics, University of Edinburgh, UK*

<sup>2</sup>*The Alan Turing Institute, London, UK*

<sup>3</sup>*School of Biological Sciences, University of Edinburgh, UK*

<sup>4</sup>*Corresponding author: d.oyarzun@ed.ac.uk*

(Dated: 2 February 2023)

**Abstract:** Recent advances in synthetic biology have enabled the construction of molecular circuits that operate across multiple scales of cellular organization, for example by interfacing gene regulation with signalling or metabolic pathways. Computational methods can effectively aid and accelerate the design process, but current methods are generally unsuited for systems with multiple temporal or concentration scales, as these are challenging to simulate due to their numerical stiffness. Here, we present a machine learning method for the efficient optimization of biological circuits across scales. We employ a Bayesian optimization approach and nonparametric statistical models to learn the shape of a performance landscape and iteratively navigate the design space towards an optimal design. This strategy allows the joint optimization of both circuit architecture and parameters, and hence provides a feasible approach to solve a highly non-convex optimization problem in a mixed-integer input space. We illustrate the applicability of the method on gene circuits designed to control biosynthetic pathways, as these display strong nonlinearities and have molecular components that evolve in different timescales and different scales of molecular concentrations. We test the method on various models of dynamic production pathways previously built in the literature, and highlight its ability to optimize large multiscale models with more than 20 species and circuit architectures, as well as large parametric sweeps that are useful for assessing the robustness of optimal designs to perturbations. The method can serve as an efficient *in silico* screening method for circuit architectures prior to experimental testing.

## I. INTRODUCTION

The design of molecular circuits with prescribed functions is a core task in synthetic biology<sup>[1]</sup>. These circuits can include components that operate across various scales of cellular organization, such as gene expression, signalling pathways<sup>[2]</sup> or metabolic processes<sup>[3]</sup>. Computational methods are widely employed to discover circuits with specific dynamics<sup>[4,6]</sup> and, in particular, optimization-based strategies can be employed to search over design space and single out circuits predicted to fulfil a desired function<sup>[7,10]</sup>. However, circuit design requires the specification of circuit architecture, i.e. the circuit “wiring diagram”, as well as the strength of interactions among molecular components. Since circuit architectures are discrete choices and molecular interactions depend on continuous parameters such as binding rate constants, circuit design leads to mixed-integer optimization problems that can be notoriously difficult to solve<sup>[11]</sup>. Moreover, when circuits operate across multiple scales, their computational models become numerically stiff<sup>[12]</sup>, resulting in extremely slow simulations that make their mixed-integer optimization challenging or even impossible to solve.

Previous works on computational circuit design has largely focused on genetic circuits that operate in isolation from other layers of the cellular machinery (Figure 1A). A range of techniques have been employed to identify functional circuits, including exhaustive search<sup>[4,6,13]</sup>, computational optimization<sup>[7,8]</sup>, Bayesian design<sup>[14,15]</sup>, and machine learning<sup>[9,16]</sup>. While these methods differ on their specific modelling strategies and as-

sumptions, they all require computational simulations at many, typically thousands to millions, parameter value locations in the design space. In the case of multiscale circuits, the computational cost of simulations grows sharply and limits the application of current optimization. As a result, often these multiscale systems cannot be simulated at the large number of locations in the design space needed by computational search algorithms.

A notable example of this challenge appears in genetic circuits for dynamic control of metabolic pathways<sup>[17,20]</sup>. These systems are receiving substantial attention thanks to several successful implementations that improved yields as compared to classic techniques in metabolic engineering<sup>[21,23]</sup>. The key principle is to put enzymatic genes under the control of metabolite-responsive mechanisms that couple heterologous expression to the concentration of a pathway intermediate<sup>[3]</sup>. This creates feedback loops between enzyme expression and pathway intermediates that allow controlling pathway activity in response to upstream changes in growth conditions or precursor availability. Such dual genetic-metabolic systems are particularly challenging to simulate efficiently, as metabolites and enzymes vary in different timescales, from milliseconds (enzyme kinetics) to minutes (enzyme expression), and they also appear in vastly different concentrations; in bacteria enzymes are typically expressed in nanomolar concentrations, whilst metabolites are found typically above the millimolar range<sup>[24]</sup>. Moreover, the implementation of these systems is costly and requires substantial experimental fine-tuning. As a result, a central task prior of implementation is the choice of a suitable feedback control loops between metabolites and enzymatic genes, and the strength of interactions be-

tween metabolites and actuators of gene expression such as transcription factors<sup>25</sup> or riboregulators<sup>26</sup>. The design of control architectures is particularly important, because there are many ways of building similar control loops<sup>27</sup>, for example by employing combinations of transcriptional activators and repressors<sup>28,29</sup>, that may differ in their performance and cost of implementation.

Here, we present a fast and scalable machine learning approach for optimization of multiscale circuit architectures and parameters (Figure 1A). The method is based on Bayesian optimization coupled with differential equation models, and we highlight its utility in various models of metabolic pathways under genetic feedback control<sup>30</sup>. Using a toy example for a simple pathway, we first show that the method converges rapidly and outperforms other optimizers by a substantial margin. We then consider real-world models of metabolic pathways in *Escherichia coli* for the production of several relevant precursors: glucaric acid<sup>31</sup>, fatty acids<sup>28</sup>, and p-aminostyrene<sup>29</sup>. We use these pathways to illustrate how the speed of our method enables screening optimal designs in realistic design tasks that would otherwise be infeasible to compute, including the impact of uncertain enzyme kinetic parameters, the use of layered architectures that combine metabolic and genetic control, and the optimization of a complex model with 23 differential equations, 27 candidate control architectures, and 19 parameters to be optimized. Our parameterization of the discrete architecture space enables both large numbers of possible architectures and removal of oscillatory or positive feedback architectures from consideration. Machine learning methods such as this one can speed the construction of synthetic biological circuits and present a novel approach to design space exploration.

## II. RESULTS

### A. Bayesian optimization for joint optimization of circuit architecture and parameters

In general, a circuit design task can be stated as the following mixed-integer optimization problem:

$$\begin{aligned} & \min_{p_d, p_c} J(x, p_c, p_d), \\ & \text{subject to:} \\ & \quad dx/dt = h(x), \\ & \quad p_c \in \mathcal{C}, p_d \in \mathcal{D}, \end{aligned} \quad (1)$$

where  $J(x, p_c, p_d)$  is a performance objective to be optimized over a space of continuous parameters  $p_c$  and a discrete set of circuit architectures  $p_d$ . The function  $h(x)$  is a nonlinear function describing the dynamics of  $x$ . The ODE in (1) describes the temporal dynamics of circuit components and are typically built from mass balance equations. Common examples of continuous parameters in applications are binding affinities between DNA and

regulatory proteins, or the strength of protein-protein interactions. Conversely, circuit architecture would typically involve various combinations of positive and negative feedback loops among molecular species. We have stated the problem as minimization of  $J$ , but similar formulations can be posed as a maximization problem.

To illustrate the utility of the method in a range of design problems, we focus on genetic control circuits for metabolic pathways that synthesize high-value products. In this case, the ODE in (1) contains two sets of equations:

$$\begin{aligned} ds/dt &= f(s, e) - \lambda s, \\ de/dt &= u(s, p_c, p_d) - \lambda e, \end{aligned} \quad (2)$$

where  $s$  and  $e$  are vectors of metabolite and enzyme concentrations, respectively. Both sets of species change in vastly different timescales; metabolic reactions operate in the millisecond range or faster<sup>36</sup>, whilst enzyme expression changes in the scale of minutes or longer. Moreover, metabolites and enzymes are also present in different ranges of concentrations, from nM for enzymes to mM and higher for metabolites<sup>24</sup>. As a result, simulation of the ODE in (2) is time consuming, particularly when this needs to be done many times as part of an optimization-based search. The term  $f(s, e)$  describes the mass balance relations between pathway intermediates, while the parameter  $\lambda$  models the dilution effect by cell growth. The vector  $u(s, p_c, p_d)$  describes the enzyme expression rates controlled by some pathway intermediates, and typically take the form of sigmoidal dose-response curves that lump together processes such as metabolite-TF or metabolite-riboregulator interactions<sup>25</sup>. The continuous parameters  $p_c$  model the dose-response curves of the feedback mechanisms, whereas the discrete parameters  $p_d$  specify the control architecture.

The performance objective  $J$  can be flexibly used to model common design goals such as production flux, yield or titer, as well as cost-benefit tasks that balance production with the deleterious impact of the pathway on the physiology of the host. To first establish a baseline for the performance of our method, we employed a simple toy pathway model that displays common features found in real metabolic pathway (Figure 1C). The model includes a metabolic branch point through a heterologous pathway with two enzymatic steps. As a performance objective we used

$$J = \alpha_1 \underbrace{\int_0^T |V_{\text{in}} - V_{\text{out}}(t)| dt}_{\text{production loss}} + \alpha_2 \underbrace{\int_0^T (u_1(t) + u_2(t)) dt}_{\text{pathway cost}}, \quad (3)$$

where  $V_{\text{in}}$  is the metabolic flux through the main branch,  $V_{\text{out}}(t)$  is the temporal evolution of the production flux, and  $u_i(t)$  are the expression rates of both pathway enzymes. Minimizing the first term in  $J$  is equivalent to maximizing the production flux, while minimization of

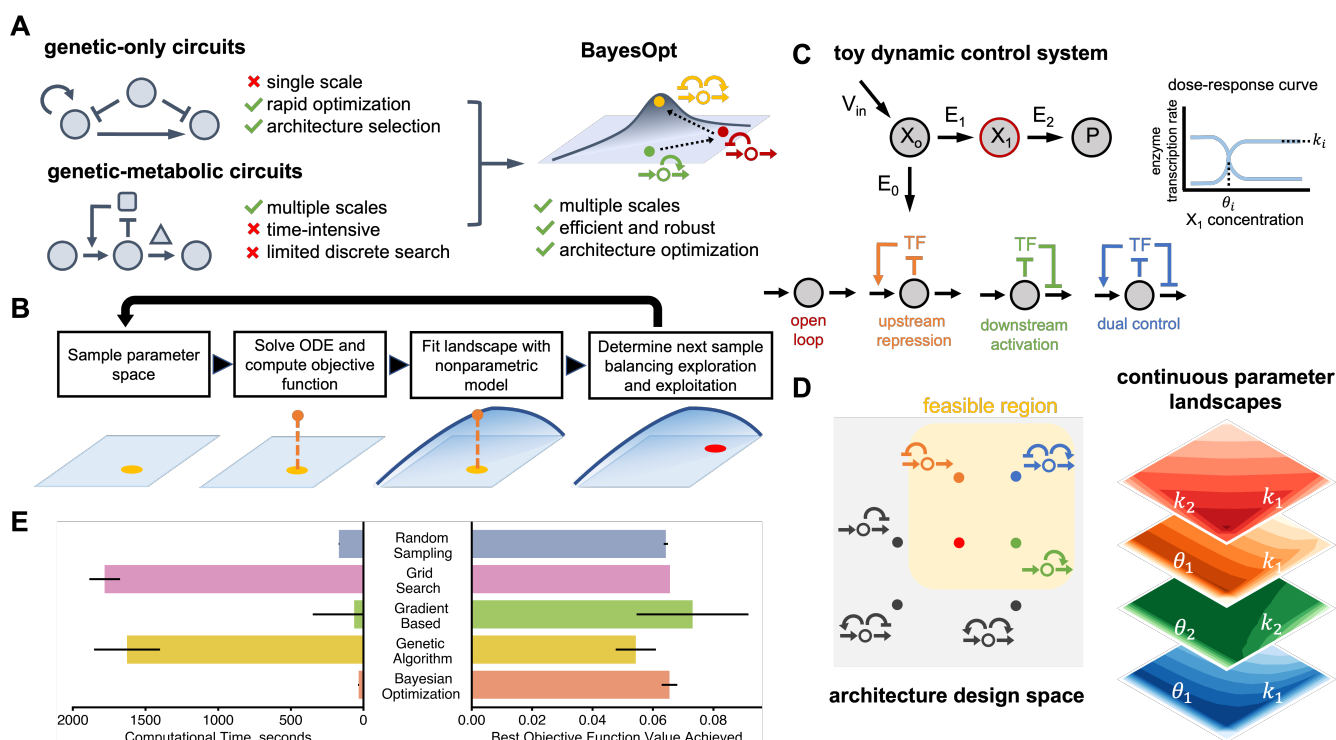

**FIG. 1. Bayesian optimization for the design of circuit architectures and parameters.** (A) Previous optimization methods have focused on genetic circuits in isolation from other cellular processes. For multiscale circuits, optimization approaches become infeasible due to the difficulty of simulating stiff dynamical systems in many locations of the design space; a common example of such multiscale systems are gene circuits that control metabolic production<sup>31</sup>. We propose the use of Bayesian optimization (BayesOpt) for efficient optimization of architectures and parameters in multiscale circuits. (B) Schematic of a mixed-integer Bayesian optimization loop; the objective function is regarded as a random variable to be optimized over an input space comprised of continuous parameters and a set of discrete circuit architectures. At each iteration, the algorithm computes the value of the objective function from the solution of an ordinary differential equation (ODE) model at a single location in the input space. The algorithm learns the shape of the objective landscape using a nonparametric statistical model<sup>32</sup>, which is employed to propose a new location in the input space through an “acquisition function” designed to balance exploration and exploitation of the input space; more details in Methods. The algorithm iteratively learns the shape of the performance landscape until convergence to a global optimum. (C) Example metabolic pathway under gene regulation. We consider three negative feedback architectures plus open loop control. The intermediate  $X_1$  binds a transcription factor (TF) that controls the expression of pathway enzymes, either as an activator or repressor. The TF dose-response curve (at right) is described by three parameters,  $k_i$ ,  $\theta_i$ , and  $n$ , where  $i = 1, 2$ . The aim is to find designs with optimal architecture and dose-response parameters ( $k_i, \theta_i$ ); for simplicity the Hill coefficient was fixed to  $n_i = 2$ . (D) Performance landscapes of the four feasible circuit architectures. We exclude architectures with positive feedback loops as these are prone to multistability<sup>33</sup>. The shape of the performance landscape defined in (3) shows substantial variation across the four architectures. This leads to a highly non-convex mixed-integer optimization problem. Heatmaps show the value of the objective  $J$  computed on a regular grid of the indicated parameters. (E) Comparison of BayesOpt against other strategies using the toy model as a benchmark. Shown are the results for random sampling ( $N = 1,000$  samples), grid search ( $N = 40,000$ ), a genetic algorithm<sup>34</sup> ( $N = 100$  individuals,  $N = 1000$  generations), and a gradient-based optimizer to find optimal continuous parameter values for each architecture<sup>35</sup>. Lower objective function values are better.

the second term penalizes total amount of enzyme expressed during the culture; the weight  $\alpha$  can be used to control the balance between costs and benefits of expressing the heterologous pathway.

We considered the four control architectures shown in Figure 1C, which include open loop control as well as three different implementations of negative feedback control using a metabolite-responsive transcription factor. Negative feedback is widely employed in gene circuits as it has substantial benefits in terms of robustness and performance, and their properties have been extensively studied in the literature<sup>37,38</sup>. To illustrate the challenge of jointly optimizing circuit architecture

and parameters, in Figure 1D we show a schematic of the design space. The four control architectures under consideration reside at different discrete points in the architecture space. Within each architecture the continuous performance landscape computed as a function  $J$  of the dose-response parameters  $p_c$  shows substantial variations. We observe cases with convex landscapes with a clear optimum (e.g. dual control) and landscapes with flat basins where most optimization algorithms would struggle to find the optimum (e.g. downstream activation). When searching over the space of architectures and parameters simultaneously, the problem becomes a mixed-integer, non-convex optimization that is extremely

challenging to solve with traditional approaches.

We implemented a BayesOpt routine to jointly compute the architecture ( $p_d$ ) and dose-response parameters ( $p_c$ ) that minimize the performance objective in Eq. (3). We benchmarked its performance against several other methods, including a random search, an exhaustive grid search, a gradient based method, and a genetic algorithm (Figure 1E). The algorithm was able to compute optimal solutions rapidly (average 27 seconds per run across 100 runs) and robustly (standard deviation less than 2.5% of the mean optimal objective function value). BayesOpt runs significantly faster than the other methods, and provides over a 30-fold improvement over a genetic algorithm. The accuracy of the optimum, quantified by the minimal value of the objective function, is on average 11.4% worse than the genetic algorithm, but this falls within the variation of the latter across several runs. We also note that the traditional gradient-based optimizer proved unreliable and failed to converge on 14.5% of runs.

One key advantage of Bayesian methods is that they are not gradient-based, and therefore are not constrained to navigate the space smoothly in the direction of steepest descent. Gradient-based methods can get trapped in local minima and struggle to find the global optimum, especially in highly nonconvex landscapes like the ones presented here. In contrast, BayesOpt does not converge by chasing minima directly but rather by modelling the entire objective function landscape, which results in rapid and reliable results. The method can perform multiple "jumps" between distant locations in the discrete-continuous search space without incurring any penalty. Each subsequent sample is selected to maximize the expected improvement on the best sample found so far, with no spatial relationship implied between adjacent samples.

The speed of our approach enables the computation of large solution ensembles under model perturbations such as sweeps of key model parameters. In addition, our method can search high-dimensional mixed-integer design spaces. We next illustrate the versatility of the approach in a range of relevant real-world pathways that require solving the optimization problem for large samples of parameter values.

## B. Robustness of control circuits to uncertainty in enzyme kinetic parameters

A challenge in building pathway models is the substantial uncertainty on the enzyme kinetic parameters; this is particularly critical for pathways that include regulatory mechanisms such as allostery or product inhibition, which are often poorly characterized. Databases such as BRENDA<sup>40</sup> often have insufficient data on enzyme kinetics for a particular host strain or substrate of interest. Since pathway dynamics can strongly depend on enzyme kinetics, the parametric uncertainty requires extensive sweeps of kinetic parameters to determine the robustness of a specific control architecture deemed to be optimal.

We focused on a pathway for synthesis of glucaric acid in *E. coli* (Figure 2A), a key precursor for many downstream products<sup>31</sup>. The pathway branches from glucose-6-phosphate (g6p) in upper glycolysis and contains three enzymatic steps (Ino1, SuhB, and MIOX). Doong and colleagues implemented a dynamic control circuit using the dual transcriptional regulator IpsA which responds to the intermediate myo-inositol (MI)<sup>20</sup>. The pathway enzyme MIOX is allosterically activated by its own precursor, and one intermediate, MI, can be exported to the extracellular space. We employed a previously developed ODE model<sup>10</sup> that was parameterized using a combination of enzyme kinetic data and omics measurements, and considered the same four control architectures as in the previous example, including various alternative implementations of negative feedback control.

The results in Figure 2B show a typical run of the optimizer when using the cost-benefit performance objective in (3), together with the fraction of samples in which the algorithm explored each control architecture across the successive iterations. The optimal architecture (dual control in this case) was found quickly and the algorithm was able to further decrease the value of the objective function by exploring the space of dose-response parameters of IpsA. We observe that as the iterations progress, the algorithm shows a remarkable ability to explore other architectures despite their larger objective function values, thus highlighting the global nature of the algorithm.

To explore the impact of uncertain enzyme kinetics, we perturbed the parameters of the rate-limiting MIOX allosteric reaction:

$$V_{\text{MIOX}} = \frac{V_{\text{m, eff}} \text{MI}}{k_{\text{m, MIOX}} + \text{MI}}, \quad (4)$$

given  $V_{\text{m, eff}} = V_{\text{m, MIOX}} \frac{1 + a_{\text{MIOX}} \text{MI}}{k_{\text{a, MIOX}} + \text{MI}}$ ,

where  $V_{\text{m, MIOX}}$  is the maximum rate of reaction,  $k_{\text{m, MIOX}}$  is the Michaelis-Menten constant, and  $k_{\text{a, MIOX}}$  and  $a_{\text{MIOX}}$  are allosteric activation constants. We solved the optimization problem for 1000 combinations of these three parameters, which took under 16 hours in a standard laptop machine. Perturbing the kinetic parameters of the glucaric acid pathway did not significantly affect the minimum objective function value achieved, indicating that the optimum is robust to uncertainty in the kinetic parameters (Figure 2C). However, the mean optimal objective function value was not significantly higher among the perturbed samples. We found that the dual control architecture was chosen as optimal in more than 85% of samples (Figure 2D). As a result, we examined the optimal dose-response parameters found for this dominant architecture in more detail. The maximal enzyme expression rates ( $k$ ) and regulatory thresholds ( $\theta$ ) control the shape of the dose-response curves. The distribution of optimal  $k$  and  $\theta$  parameter values is similar for the perturbed and background optimization runs, so we will consider only the perturbed distributions in Figure 2E.

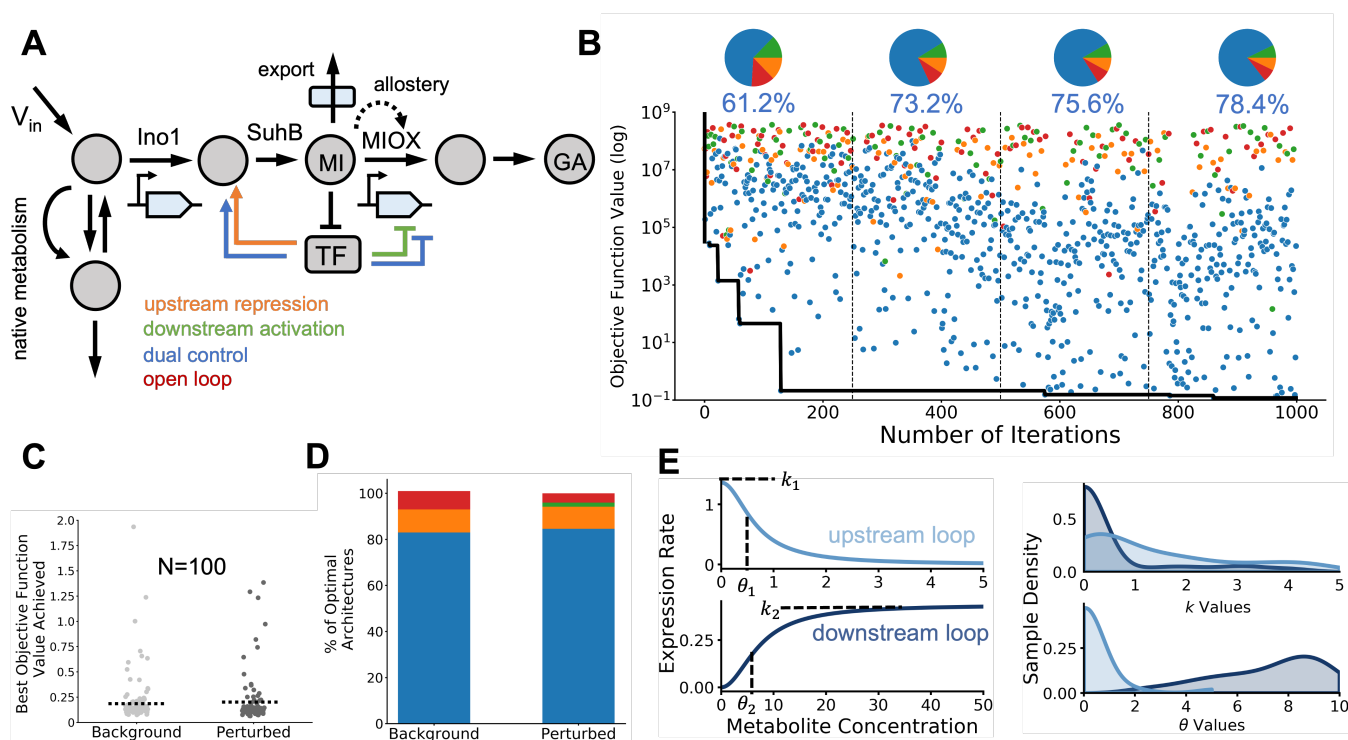

**FIG. 2. Robustness optimal circuits to parameter uncertainty.** (A) Schematic of a dynamic pathway for production of glucaric acid in *Escherichia coli*<sup>20</sup>. The pathway includes allosteric inhibition and export of an intermediate to the extracellular space. The core pathway components myoinositol (MI) and glucaric acid (GA) are modelled explicitly, as are the enzymes Ino1 and MIOX. The enzyme SuhB is not rate-limiting and is not modeled explicitly. (B) Sample run of the BayesOpt algorithm for 1,000 iterations of the loop in Figure 1B. Black line shows the descent on the value of the objective function. Dots show all samples colored by architecture; pie charts show the fraction of architectures explored by the algorithm, and the fraction of samples taken from the majority architecture (dual control). The first quarter of the run had the most exploration of architectures other than dual control, with 38.6% of samples coming from non-majority architectures. This percentage steadily decreased over the iterations but did not drop below 20%, illustrating the global nature of the optimization routine. (C) To examine the robustness of the optimal solutions to parameter uncertainty, we computed optimal solutions for many perturbed parameters of the allosteric activation of MIOX by its substrate myo-inositol (MI). Strip plot show the best objective function values achieved for background and perturbed kinetic parameters ( $V_{m,MIOX}$ ,  $a_{MIOX}$ ,  $k_{a,MIOX}$ ) in Eq. (4). Kinetic parameters were perturbed using Latin Hypercube sampling<sup>39</sup> on the range (-100%, +100%) of the nominal values (Supplementary Information). We observed little difference between background and perturbed values; dashed line denotes the mean value of the objective function. Only one of the  $N = 100$  runs for perturbed parameters failed to converge the optimum. (D) Optimal architectures across runs with background and perturbed parameter values. Both background and perturbed systems resulted in over 80% of runs selecting dual control as the optimal architecture. (E) Average dose-response curves and distribution of optimal parameters for the dual control architecture with perturbed allosteric parameters. The repressive and activatory loops have substantially different mean dose-response curves on average. The distributions of the dose-response parameters (right) show important variations in their mean and dispersion. The parameter  $k_i$  and  $\theta_i$  determine the maximal enzyme expression rate and regulatory threshold, respectively.

We found that the upstream repressive loop and downstream activatory loop had different optimal dose-response curves, corresponding to different optimal values of the continuous parameters. Optimal values of the upstream repression threshold  $\theta_1$  are low (mean value 0.64) and compressed into a narrow range compared to the optimal values of downstream repression threshold  $\theta_2$  (mean value 7.24). The larger standard deviation on  $\theta_2$  values is reflected in the wider confidence interval over the dose response curve for the downstream loop as compared to the upstream loop. Experimental fine-tuning of a dual control circuit might target parameters with optimal values with a wide range, such as  $k_1$ , as varying these parameters is less likely to impair circuit function. Overall, these results show the robustness of the glucaric

acid dual control system to kinetic parameter uncertainty and demonstrate the possibilities enabled by the speed of BayesOpt. We next demonstrate the stability of the method in more challenging scenario with objective functions that display flat basins at the optimum.

### C. Consistency of optima across flat performance landscapes

A potential challenge in circuit design arises when the objective function is relatively flat across large domains of the parameter space. This happens when different values of the decision variables result in similar values of the objective function. This is common in biochemical systems, because they often have steady states that are

insensitive to some parameters<sup>41</sup>. Here, we examine the impact of this property on the performance of our algorithm, using a model of fatty acid synthesis under various modes of feedback regulation.

Fatty acids are an essential energy source and cellular membrane component. In addition, hydrocarbons derived from fatty acids have attracted attention as a potential biofuel source<sup>18,42</sup>. Recent work engineering metabolic and genetic control loops showed that negative feedback control could speed up the rise to steady-state conditions<sup>23</sup>. The pathway built in literature expressed a thioesterase under transcriptional control, shown as the negative metabolic loop (NML) architecture in Figure 3A. In addition to transcription-factor mediated negative feedback loops, this model also includes individually implemented direct genetic loops where a repressor is expressed on the same promoter as the enzyme. These two different scales of loops interface with different levels of cellular organization.

We explore several control architectures previously proposed in the literature<sup>23</sup> (Figure 3A; open loop architecture not shown). A representative optimization run (Figure 3B) shows that the negative gene loop (NGL, green) and negative metabolic loop (NML, orange) architectures perform, on average, better than the other three architectures. BayesOpt samples taken from the two open-loop architectures were, on average, two orders of magnitude worse than samples taken from NML and NGL architectures. Despite such hierarchy of loss values across the five architectures, the method effectively explores all architectures throughout the optimization run. We next aimed to explore how stable these architectural differences were across many simulations. We ran BayesOpt 100 times and found the NML architecture to be optimal on 76% of runs. The remaining 24% of runs found the NGL architecture to be optimal.

The performance landscapes differ significantly in their shape between architectures (Figure 3C). For instance, the open loop intermediate landscape is a linear plane, while the NML landscape is much flatter with a single area of exponentially higher losses as the promoter binding affinity  $R_{t_l}$  increases for low values of the repressor binding affinity  $R_{t_l, \text{tetR}}$ . Representative optima found by the single-architecture optimizations, shown in white, occurred along the boundaries of the parameter space. Some parameters, like  $R_{t_l}$  for the layered negative metabolic loop circuit, find their optima on a very narrow range of values. However, some parameters, like the *tesA* promoter binding affinity ( $R_{FL}$ ) of the negative gene loop, were optimal along an entire boundary of the parameter space. These “wider” optima correspond to flatter basins in the performance landscape, where sweeping the parameters around the optimum does not significantly change the objective function value. Despite this landscape property, BayesOpt converges reliably on a narrow range of optimal losses associated with each architecture.

#### D. Scalability to large pathway models

Our previous case studies have been limited to circuits with a single metabolite controlling gene expression and a relatively small number of control architectures. We now study a large model for the synthesis of p-aminostyrene (p-AS), an industrially relevant vinyl aromatic monomer, in *E. coli* (Figure 4A)<sup>43</sup>. This model has two possible metabolites that can regulate gene expression, namely p-aminocinnamic acid (p-ACA) and p-aminophenylalanine (p-AF), both of which can act as ligands for aptazyme-regulated expression device (aRED) transcription factors<sup>44</sup>, and three genes to be controlled. The aRED transcription factors can also act as dual regulators (activators or repressors) on any of the three promoters involved in the pathway. For simplicity, we limit the design space to control architectures without positive feedback loops, as these are prone to bistability<sup>33</sup>. This results in 27 possible control architectures and 19 continuous parameters to be optimized. The model also has a number of additional complexities. It contains operon-based gene expression commonly found in bacterial systems (genes *papA*, *papB*, and *papC* are expressed on the *papABC* operon), it includes a detailed description of mRNA dynamics and protein folding, which results in a large model with 23 differential equations, and it can also display oscillatory dynamics.

In addition to expression of heterologous enzymes, the accumulation of toxic intermediates is another major source of genetic burden to host organisms. The p-AS model has several sources of toxicity present in the pathway<sup>29,43</sup>. The intermediate p-ACA and the efflux pump used to remove p-ACA from cells are both cytotoxic, while another intermediate, p-AF, leaks from cells. The pathway enzyme L-Amino Acid Oxidase (LAAO) depletes key aromatic amino acid metabolites and creates toxic hydrogen peroxide as a byproduct. The model incorporates these various types of toxicity in the form of a toxicity factor  $\tau$ . This toxicity factor is of the form

$$\tau = \frac{k_i}{k_i + \frac{p_{ACA}}{t_a} + \frac{P_{efflux}}{t_p} + \frac{LAAO}{t_l}}, \quad (5)$$

where  $t_l$ ,  $t_a$ , and  $t_p$  are chemical-specific toxicity factors. Enzyme-induced toxicity  $t_l$  scales the key metabolite depletion rate driven by the enzyme LAAO. Metabolite-induced toxicity  $t_a$  scales the impact of toxic intermediate p-ACA concentration. Finally, protein-induced toxicity  $t_p$  reflects the toxicity caused by efflux pump expression. The toxicity factor acts as a scaling coefficient on the pathway synthesis, degradation, and folding reaction rates.

Despite the complexity and size of the p-AS model, we observe that BayesOpt explores many of the 27 possible architectures and converges to a low value of the objective function (Figure 4B); this was also achieved at a reasonable computational cost (mean run time under two minutes). We do not explicitly name the architec-

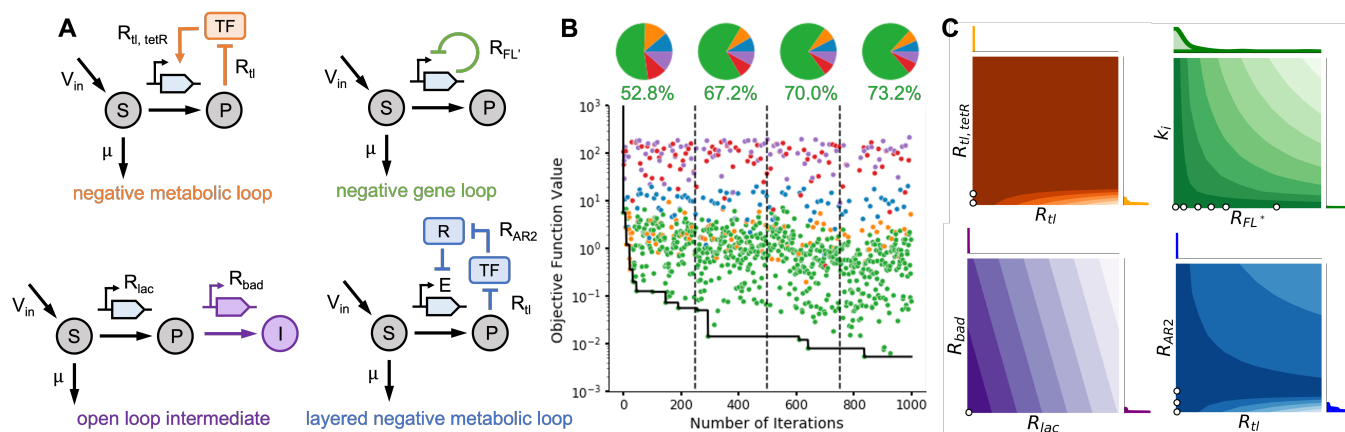

**FIG. 3. Performance landscapes of fatty acid synthesis pathway.** (A) Pathway diagrams with various control architectures implemented in *Escherichia coli*<sup>[28]</sup> (open loop architecture, red, not shown). The metabolic loop employs a metabolite-responsive transcription factor, whereas the gene loop includes only a repressor expressed on the same promoter as the enzyme. (B) Representative run of BayesOpt showing the best objective function value (black line). All samples are colored by their architecture. Pie charts of each quarter of the run show continued exploration of all architectures despite clear stratification in losses. (C) Performance landscapes of four architectures, computed over a regular grid with  $N = 400$  samples. The marginal distributions of optimal parameter values were computed over 100 single-architecture. White dots are representative optimal parameter value samples in the landscape, showing that some parameters, such as  $R_{FL}$ , have a large variation, and thus are indicative of a landscape with a flat basin at the optimum.

tures but rather specify them based on the function (e.g. repression, R) and ligand (e.g. p-ACA, 1) at each control point. The best architecture selected in the sample run was R2-R2-A2, but there is no clear best architecture when the optimization is run many times. No architecture is optimal for more than 15% of test runs, demonstrating that there are combinations of architectures and parameter values that achieve similar optimal losses. This broad distribution of optimal architectures appears even if the optimal loss achieved is much smaller than the mean. Several architectures of the model can display oscillatory solutions. We chose to exclude these undesirable solutions from search by applying Scipy peak detection<sup>[35]</sup> and adding a large regularization term to the objective function of oscillatory solutions.

In order to investigate the robustness to chemical toxicity, we perturbed the metabolite-induced toxicity  $t_a$  and protein-induced toxicity  $t_p$  in (5). The optimal loss values were found to be comparable between perturbed and background systems (Figure 4C). Additionally, when projected onto a 2-dimensional space using principal component analysis, the distribution of background parameter values was similar to the distribution of perturbed solutions, indicating that the perturbation did not significantly affect the optimal parameters selected (Figure 4D)<sup>[45]</sup>. The p-AS pathway approaches an upper limit on the complexity of dynamic control systems currently possible to implement experimentally.

### III. DISCUSSION

Synthetic biologists enjoy an unprecedented level of control over biological components. This has allowed the

construction of circuits on increased complexity and acting across various levels of biological organization. However, large design spaces and multiple scales of biological organization can become substantial challenges for the rapid design of functional systems.

Gene circuits designed to control metabolic pathways provide an excellent example of such challenges, as they integrate fast metabolic timescales with the much slower dynamics of gene expression. Moreover, the choice of regulators, control points, and control architectures adds multiple degrees of freedom that are infeasible to explore experimentally. Computational methods can aid the design of such systems prior to implementation and serve as tools for *in silico* screening of competing designs that may have similar performance but entail different cost of wetlab implementation.

Previously implemented metabolic control systems have been built primarily based on application-specific knowledge of pathway features<sup>[21][22]</sup>, and there is a lack of computational methods that can accelerate the design cycle. In this paper we presented the application of a machine learning method widely for deep neural networks for the joint optimization of biological architectures and parameters. We showed the efficiency and scalability of the method in several real-world case studies from metabolic engineering. The p-aminostyrene pathway is more complex than systems typically implemented in literature, which suggests that the method is applicable across real-world design tasks. The method is particularly well suited for cases in which the multiple scales prevent efficient simulation of ODE models in many locations of the design space. We anticipate several novel applications of this work to other problem areas where discovery or tuning of multiscale models has been

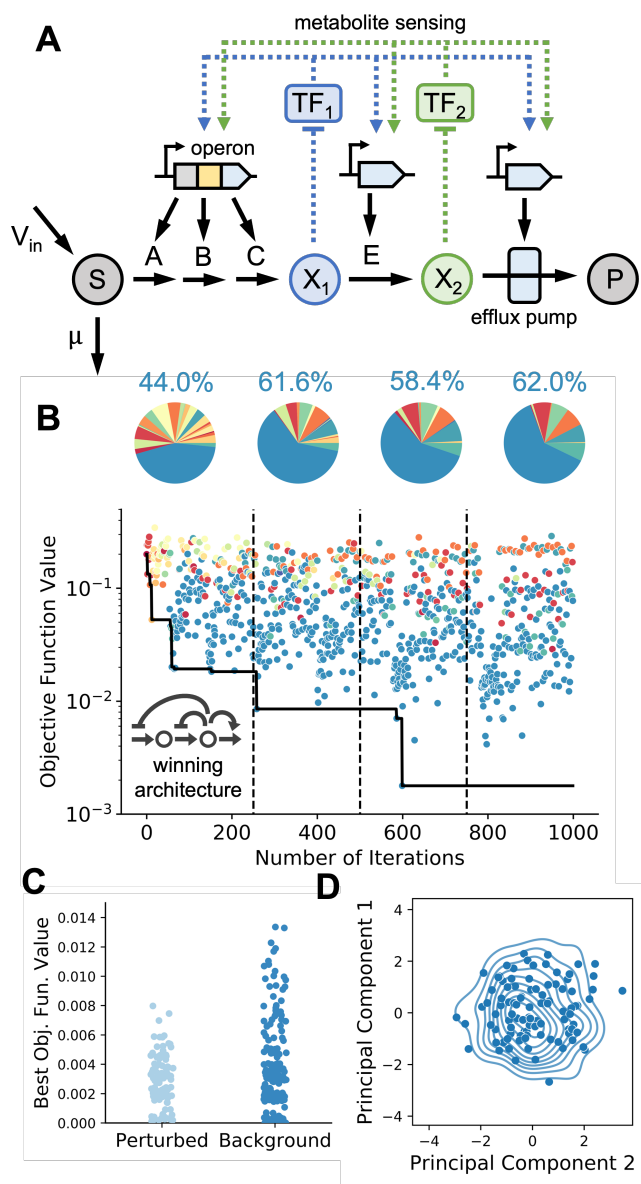

**FIG. 4. Bayesian optimization in a complex pathway.** (A) Schematic of pathway for production of p-aminostyrene<sup>[29]</sup>. Two intermediates can act as ligands for metabolite-dependent riboregulators, and three promoter sites of control. The optimization problem has 16 continuous decision variables and 32 circuit architectures. The substrate  $S$  is converted by enzymes  $A$ ,  $B$ , and  $C$  to  $X_1$ , which is then converted by  $E$  to  $X_2$ . The toxic substrate  $X_2$  is then pumped out of the cell via an efflux pump to form the product  $P$ . Both  $X_1$  and  $X_2$  can act on the transcription factors  $TF_1$  and  $TF_2$ . (B) Representative run of the BayesOpt algorithm; the method samples many architectures before settling on the optimal one. Pie charts show continued exploration of a large number of architectures. The winning architecture, R2-R2-A2, is shown as an inset. (C) The p-aminostyrene pathway has several forms of substrate, protein, and enzyme toxicity expressed via a toxicity factor  $\tau$  (see Equation 5). To explore the effects of protein and metabolite toxicity, we perturbed the toxicity factor. Metabolite-induced toxicity was perturbed on the nominal range ( $10E-3$ ,  $10E-4$ ) and protein-induced toxicity on the range ( $10E-4$ ,  $10E1$ ) respectively. Both ranges were selected to match the ranges provided in the literature<sup>[29]</sup>. Latin Hypercube sampling was used to generate  $N = 100$  perturbed parameter values, and the optimal solutions were compared to an equal number of background solutions using the nominal parameter values. (D) Visualization of the optimal solutions; scatter plot of principal components of the optimal parameter values for the model with perturbed toxicity parameters ( $N=100$ ). Contour plots show the background distribution of parameter values.

previously infeasible. For instance, this method could be employed to fit temporal circuit dynamics to data or discern which of several discrete circuit mechanisms most closely matches observed behavior. Computational methods such as this one can accelerate the design of biological circuits by directing experimental research with cheaper in silico screening.

## IV. METHODS

### A. Bayesian optimization

We employed the Bayesian Optimization routine implemented in the Python HyperOpt package<sup>[32]</sup>. Bayesian optimization is commonly employed for hyperparameter tuning in deep neural networks. We employed Expected Improvement as an acquisition function and a tree-structured Parzen estimator (TPE) as a non-parametric statistical model for the loss landscape. We performed a grid search over the TPE hyperparameter  $\gamma$  which controls the balance between exploration and exploitation but found little impact on the algorithm performance (Supplementary Figure S1). As a result, we used the default value of  $\gamma = 15$  (Supplementary Figure S1).

Constraints on the continuous and discrete decision variables were incorporated directly into the HyperOpt search space. At each run of the Bayesian optimization routine, the initial guess for the continuous decision variables were sampled from uniform distributions, with upper and lower bounds were taken from literature<sup>[10,29,42]</sup>. Architectures were chosen uniformly from the set of architectures without positive feedback loops.

### B. Model pathways

We considered four exemplar pathways modelled via ordinary differential equations (ODEs): the toy system in Figure 1C, the glucaric acid pathway in Figure 2A, the fatty acid pathway in Figure 3A, and the p-aminostyrene pathway in Figure 4A. Table 1 contains a summary of the four considered models. In all cases, pathway models include ODEs for both metabolites and pathway enzymes. In each case, we define the various control architectures and incorporate them as discrete decision variables in the optimization problem, i.e.  $p_d$  in Eq. (1); the continuous decision variables, i.e.  $p_c$  in Eq. (1), appear in the expression rates of the pathway enzymes. For the toy model and the glucaric acid pathway, enzyme expression was parameterized using a lumped Hill equation model to describe the interaction between a regulatory metabolite and a transcription factor. For the fatty acid and p-aminostyrene pathways, expression rates were parameterized with bespoke nonlinear functions describing specific biochemical processes. The discrete control architectures were defined in two different ways. For the toy, glucaric acid, and p-aminostyrene models, the architectures



were defined using a binary matrix to encode the mode of transcriptional control. For the fatty acid model we instead defined each architecture as a categorical choice and switched between model functions correspondingly. We note that the p-aminostyrene pathway also contains ODEs for mRNA abundance and folded/unfolded proteins. All models and their parameters are described in the Supplementary Information.

The ODE models were solved with `scikit-odes`, a Python wrapper for the sundials suite of solvers<sup>46</sup>. In all cases, the initial concentrations of heterologous pathway enzymes were assumed to be zero. Initial concentrations for native metabolites were determined by first solving a model without the heterologous enzymes up to steady state. Simulation times and initial conditions are detailed in the Supplementary Information for each model.

### C. Loss function

In all cases we employed the loss function  $J$  in Eq. (3) instantiated to each specific pathway. The loss is defined as a linear combination of costs and benefits of pathway activity so as to balance opposing design goals commonly found in applications. Since both components of the loss function have different magnitudes, for each model we first swept the weights  $\alpha_1$  and  $\alpha_2$  across many model simulations, and chose values that led to similar values for both components; this prevents the optimizer to bias the search towards low loss values caused by the scaling effects.

### CODE AVAILABILITY

Python code for this paper is available on the [Github repository](#).

### ACKNOWLEDGEMENTS

CM and DAO were supported by the United Kingdom Research and Innovation (grant EP/S02431X/1, UKRI Centre for Doctoral Training in Biomedical AI).

### REFERENCES

- 1 Jennifer a N Brophy and Christopher a Voigt. Principles of genetic circuit design. *Nature Methods*, 11(5):508–520, may 2014.
- 2 William M. Shaw, Hitoshi Yamauchi, Jack Mead, Glen Oliver F. Gowers, David J. Bell, David Öling, Niklas Larsson, Mark Wigglesworth, Graham Ladds, and Tom Ellis. Engineering a Model Cell for Rational Tuning of GPCR Signaling. *Cell*, 177(3):782–796.e27, 2019.
- 3 Fuzhong Zhang, James M Carothers, and Jay D Keasling. Design of a dynamic sensor-regulator system for production of chemicals and fuels derived from fatty acids. *Nature Biotechnology*, 30(4):354–9, mar 2012.
- 4 Wenzhe Ma, Ala Trusina, Hana El-Samad, Wendell A Lim, and Chao Tang. Defining network topologies that can achieve biochemical adaptation. *Cell*, 138(4):760–773, 2009.
- 5 Zhengda Li, Shixuan Liu, and Qiong Yang. Incoherent inputs enhance the robustness of biological oscillators. *Cell systems*, 5(1):72–81, 2017.
- 6 James Cotterell and James Sharpe. An atlas of gene regulatory networks reveals multiple three-gene mechanisms for interpreting morphogen gradients. *Molecular systems biology*, 6(1):425, 2010.
- 7 Madhukar S. Dasika and Costas D. Maranas. OptCircuit: An optimization based method for computational design of genetic circuits. *BMC Systems Biology*, 2:1–19, 2008.
- 8 Irene Otero-Muras and Julio R. Banga. Automated Design Framework for Synthetic Biology Exploiting Pareto Optimality. *ACS Synthetic Biology*, 6(7):1180–1193, jul 2017.
- 9 Tom W Hiscock. Adapting machine-learning algorithms to design gene circuits. *BMC bioinformatics*, 20(1):1–13, 2019.
- 10 Babita K Verma, Ahmad A Mannan, Fuzhong Zhang, and Diego A Oyarzún. Trade-offs in biosensor optimization for dynamic pathway engineering. *ACS Synthetic Biology*, 11(1):228–240, 2021.
- 11 Julio Banga. Optimization in computational systems biology. *BMC Systems Biology*, 2(1):47, 2008.
- 12 Ernst Hairer and Gerhard Wanner. *Solving Ordinary Differential Equations II: Stiff and differential-algebraic problems*. Springer-Verlag, 1996.
- 13 Lingxia Qiao, Wei Zhao, Chao Tang, Qing Nie, and Lei Zhang. Network topologies that can achieve dual function of adaptation and noise attenuation. *Cell systems*, 9(3):271–285, 2019.
- 14 Mae L Woods, Miriam Leon, Ruben Perez-Carrasco, and Chris P Barnes. A statistical approach reveals designs for the most robust stochastic gene oscillators. *ACS synthetic biology*, 5(6):459–470, 2016.
- 15 Javier Gonzalez, Joseph Longworth, David C James, and Neil D Lawrence. Bayesian optimization for synthetic gene design. *arXiv preprint arXiv:1505.01627*, 2015.
- 16 Jingxiang Shen, Feng Liu, Yuhai Tu, and Chao Tang. Finding gene network topologies for given biological function with recurrent neural network. *Nature communications*, 12(1):1–10, 2021.
- 17 Fuzhong Zhang, James M Carothers, and Jay D Keasling. Design of a dynamic sensor-regulator system for production of chemicals and fuels derived from fatty acids. *Nature biotechnology*, 30(4):354–359, 2012.
- 18 Peng Xu, Lingyun Li, Fuming Zhang, Gregory Stephanopoulos, and Mattheos Koffas. Improving fatty acids production by engineering dynamic pathway regulation and metabolic control. *Proceedings of the National Academy of Sciences*, 111(31):11299–11304, 2014.
- 19 Mary J Dunlop, Jay D Keasling, and Aindrila Mukhopadhyay. A model for improving microbial biofuel production using a synthetic feedback loop. *Systems and synthetic biology*, 4:95–104, 2010.
- 20 Stephanie J Doong, Apoorv Gupta, and Kristala LJ Prather. Layered dynamic regulation for improving metabolic pathway productivity in escherichia coli. *Proceedings of the National Academy of Sciences*, 115(12):2964–2969, 2018.
- 21 Cynthia Ni, Christina V Dinh, and Kristala LJ Prather. Dynamic control of metabolism. *Annual Review of Chemical and Biomolecular Engineering*, 12, 2021.
- 22 Di Liu, Ahmad A Mannan, Yichao Han, Diego A Oyarzún, and Fuzhong Zhang. Dynamic metabolic control: towards precision engineering of metabolism. *Journal of Industrial Microbiology and Biotechnology*, 45(7):535–543, 2018.
- 23 Christopher J Hartline, Alexander C Schmitz, Yichao Han, and Fuzhong Zhang. Dynamic control in metabolic engineering: Theories, tools, and applications. *Metabolic engineering*, 63:126–140, 2021.
- 24 Mona K. Tonn, Philipp Thomas, Mauricio Barahona, and Diego A Oyarzún. Stochastic modelling reveals mechanisms of metabolic heterogeneity. *Communications Biology*, 2(1):108, dec

| product                        | parameters ( $p_c$ ) | architectures ( $p_a$ ) | metabolites | enzymes | ODEs |
|--------------------------------|----------------------|-------------------------|-------------|---------|------|
| toy pathway                    | 4                    | 4                       | 2           | 2       | 4    |
| glucaric acid <sup>10,20</sup> | 4                    | 4                       | 3           | 2       | 5    |
| fatty acid <sup>28</sup>       | 2                    | 5                       | 1           | 2       | 3    |
| p-aminostyrene <sup>29</sup>   | 19                   | 27                      | 7           | 6       | 23   |

TABLE I. Summary of pathway models studied in this paper. The ODEs in the p-aminostyrene pathway also include mRNA and folding dynamics.

- 2019.
- <sup>25</sup>Ahmad A. Mannan, Di Liu, Fuzhong Zhang, and Diego A. Oyarzún. Fundamental Design Principles for Transcription-Factor-Based Metabolite Biosensors. *ACS Synthetic Biology*, 6(10):1851–1859, oct 2017.
- <sup>26</sup>Li-Bang Zhou and An-Ping Zeng. Exploring Lysine Riboswitch for Metabolic Flux Control and Improvement of L-Lysine Synthesis in *Corynebacterium glutamicum*. *ACS Synthetic Biology*, 4(6):729–734, jun 2015.
- <sup>27</sup>Madalena Chaves and Diego A. Oyarzún. Dynamics of complex feedback architectures in metabolic pathways. *Automatica*, 99:323–332, 2019.
- <sup>28</sup>Di Liu and Fuzhong Zhang. Metabolic feedback circuits provide rapid control of metabolite dynamics. *ACS synthetic biology*, 7(2):347–356, 2018.
- <sup>29</sup>Jason T Stevens and James M Carothers. Designing rna-based genetic control systems for efficient production from engineered metabolic pathways. *ACS synthetic biology*, 4(2):107–115, 2015.
- <sup>30</sup>Peter I Frazier. A tutorial on bayesian optimization. *arXiv preprint arXiv:1807.02811*, 2018.
- <sup>31</sup>Tae Seok Moon, Sang-Hwal Yoon, Amanda M Lanza, Joseph D Roy-Mayhew, and Kristala L Jones Prather. Production of glucaric acid from a synthetic pathway in recombinant escherichia coli. *Applied and environmental microbiology*, 75(3):589–595, 2009.
- <sup>32</sup>James Bergstra, Daniel Yamins, and David Cox. Making a science of model search: Hyperparameter optimization in hundreds of dimensions for vision architectures. In *International conference on machine learning*, pages 115–123. PMLR, 2013.
- <sup>33</sup>Diego A. Oyarzún and Madalena Chaves. Design of a bistable switch to control cellular uptake. *Journal of The Royal Society Interface*, 12(113):20150618, dec 2015.
- <sup>34</sup>Ryan M. Solgi. Geneticalgorithm package. <https://pypi.org/project/geneticalgorithm/>, 2020.
- <sup>35</sup>Pauli Virtanen, Ralf Gommers, Travis E Oliphant, Matt Haberland, Tyler Reddy, David Cournapeau, Evgeni Burovski, Pearu Peterson, Warren Weckesser, Jonathan Bright, et al. Scipy 1.0: fundamental algorithms for scientific computing in python. *Nature methods*, 17(3):261–272, 2020.
- <sup>36</sup>Arren Bar-Even, Elad Noor, Yonatan Savir, Wolfram Liebermeister, Dan Davidi, Dan S Tawfik, and Ron Milo. The moderately efficient enzyme: evolutionary and physicochemical trends shaping enzyme parameters. *Biochemistry*, 50(21):4402–4410, 2011.
- <sup>37</sup>Naveen Venayak, Nikolaos Anesiadis, William R Cluett, and Radhakrishnan Mahadevan. Engineering metabolism through dynamic control. *Current opinion in biotechnology*, 34:142–152, 2015.
- <sup>38</sup>Yuan Zhu, Ying Li, Ya Xu, Jian Zhang, Linlin Ma, Qingsheng Qi, and Qian Wang. Development of bifunctional biosensors for sensing and dynamic control of glycolysis flux in metabolic engineering. *Metabolic Engineering*, 68:142–151, 2021.
- <sup>39</sup>Wei-Liem Loh. On latin hypercube sampling. *The annals of statistics*, 24(5):2058–2080, 1996.
- <sup>40</sup>I Schomburg, L Jeske, M Ulbrich, S Placzek, A Chang, and D Schomburg. The brenda enzyme information system—from a database to an expert system. *Journal of biotechnology*, 261:194–206, 2017.
- <sup>41</sup>Bryan C Daniels, Yan-Jiun Chen, James P Sethna, Ryan N Gutenkunst, and Christopher R Myers. Sloppiness, robustness, and evolvability in systems biology. *Current opinion in biotechnology*, 19(4):389–395, 2008.
- <sup>42</sup>Yiming Zhang, Jens Nielsen, and Zihe Liu. Metabolic engineering of *saccharomyces cerevisiae* for production of fatty acid-derived hydrocarbons. *Biotechnology and bioengineering*, 115(9):2139–2147, 2018.
- <sup>43</sup>M Ya Goikhman, NP Yevlampieva, NV Kamanina, IV Podeshvo, IV Gofman, SA Mil'tsov, AP Khurchak, and AV Yakimanskii. New polyamides with main-chain cyanine chromophores. *Polymer Science Series A*, 53(6):457–468, 2011.
- <sup>44</sup>Andrew D Ellington and Jack W Szostak. In vitro selection of rna molecules that bind specific ligands. *nature*, 346(6287):818–822, 1990.
- <sup>45</sup>Hervé Abdi and Lynne J Williams. Principal component analysis. *Wiley interdisciplinary reviews: computational statistics*, 2(4):433–459, 2010.
- <sup>46</sup>David J Gardner, Daniel R Reynolds, Carol S Woodward, and Cody J Balos. Enabling new flexibility in the sundials suite of nonlinear and differential/algebraic equation solvers. *ACM Transactions on Mathematical Software (TOMS)*, 2020.
- <sup>47</sup>James M Carothers, Jonathan A Goler, Darmawi Juminaga, and Jay D Keasling. Model-driven engineering of rna devices to quantitatively program gene expression. *Science*, 334(6063):1716–1719, 2011.
